# Supplementary material for: Combined functional genomic and chemical screens identify SETD8 as a therapeutic target in MYC-driven medulloblastoma
Source: JCI journal article supplement (doi:10.1172/jci.insight.122933), 2019-01-10

**Supplemental Figures.**

**Supplementary Figure S1.** (a) Kaplan-Meier plots indicating overall survival in relation to SETD8 expression in WNT ( $p=0.421$ ), SHH ( $p=5.7e-07$ ), and Group 4 ( $p=4e-04$ ) subtypes. (b) SETD8 protein levels in patient Medulloblastoma subtypes.

**a**

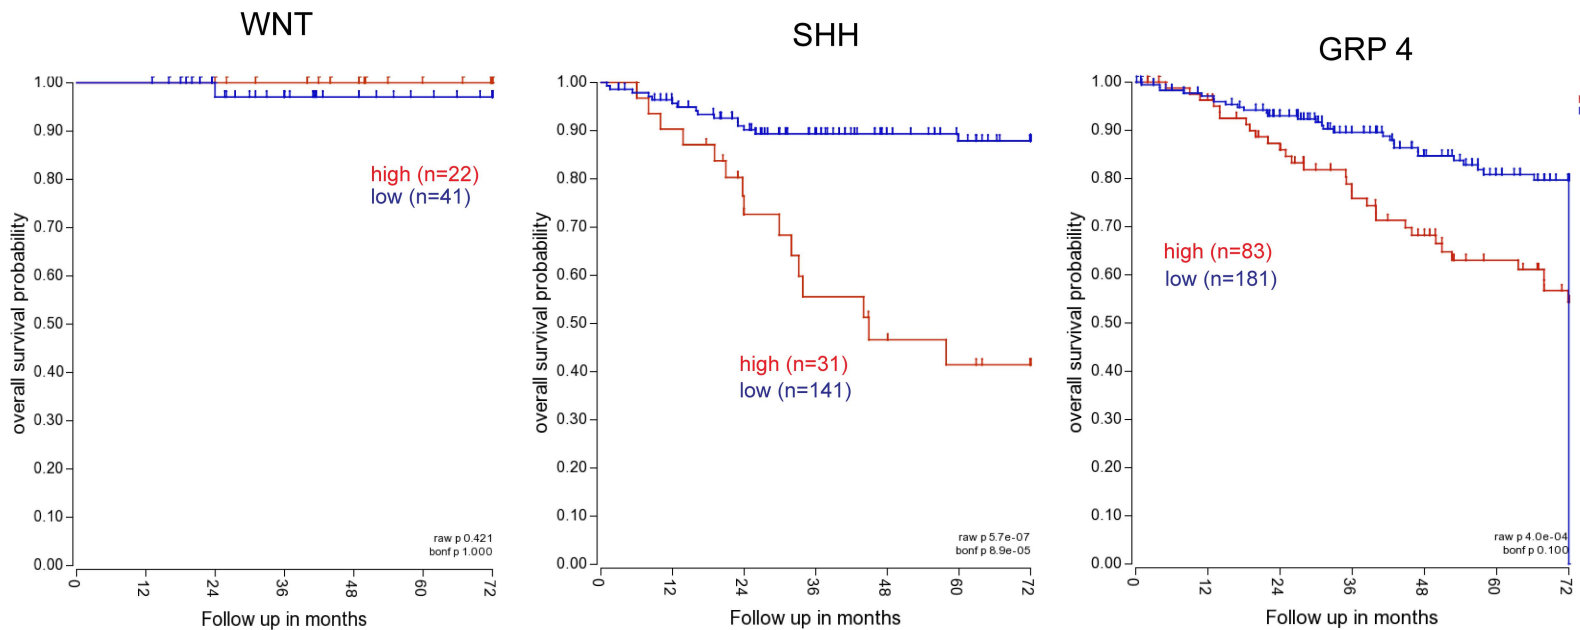

**b**

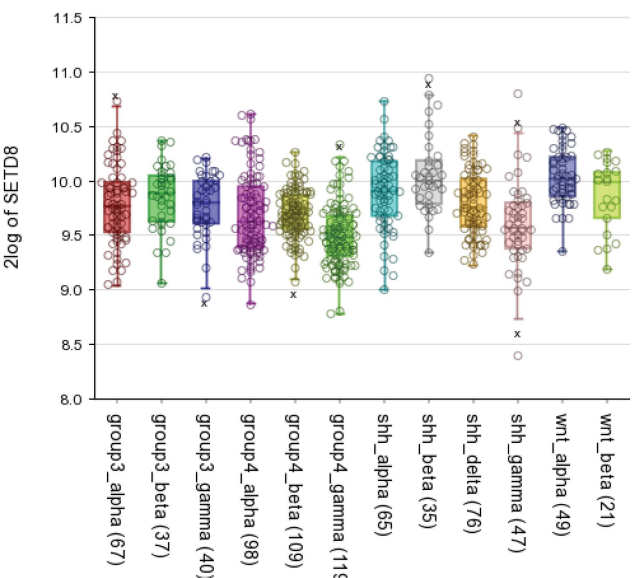

**Supplementary Figure S2.** (a) Representative images shown for D283, DAOY, and ONS76 western blot for SETD8 and Actin. Line and whisker plot represents quantification of three independent replicates. (b) Clonogenic assay of DAOY or ONS76 shnull and shSETD8 cells and methylcellulose assay with D458 and D425 shSETD8-2 and -3. Representative images are shown. Dot plots represent the mean  $\pm$  SD from three independent replicates. Asterisks indicate significant differences (unpaired t test; \*\*,p-value<0.01; \*\*\*, p-value<0.001). (c) Cell Cycle kinetics determined by flow cytometry after staining with DRAQ5 in shNull and shSETD8 MB cells. (d)  $\beta$ -galactosidase staining in D458 and D425 shNull and shSETD8 cells. Representative images shown. (e) Dot plot represents mean  $\beta$ -gal+ cells per well  $\pm$ SD. Asterisks indicate significant differences (unpaired t test; \*\*,p-value<0.01).

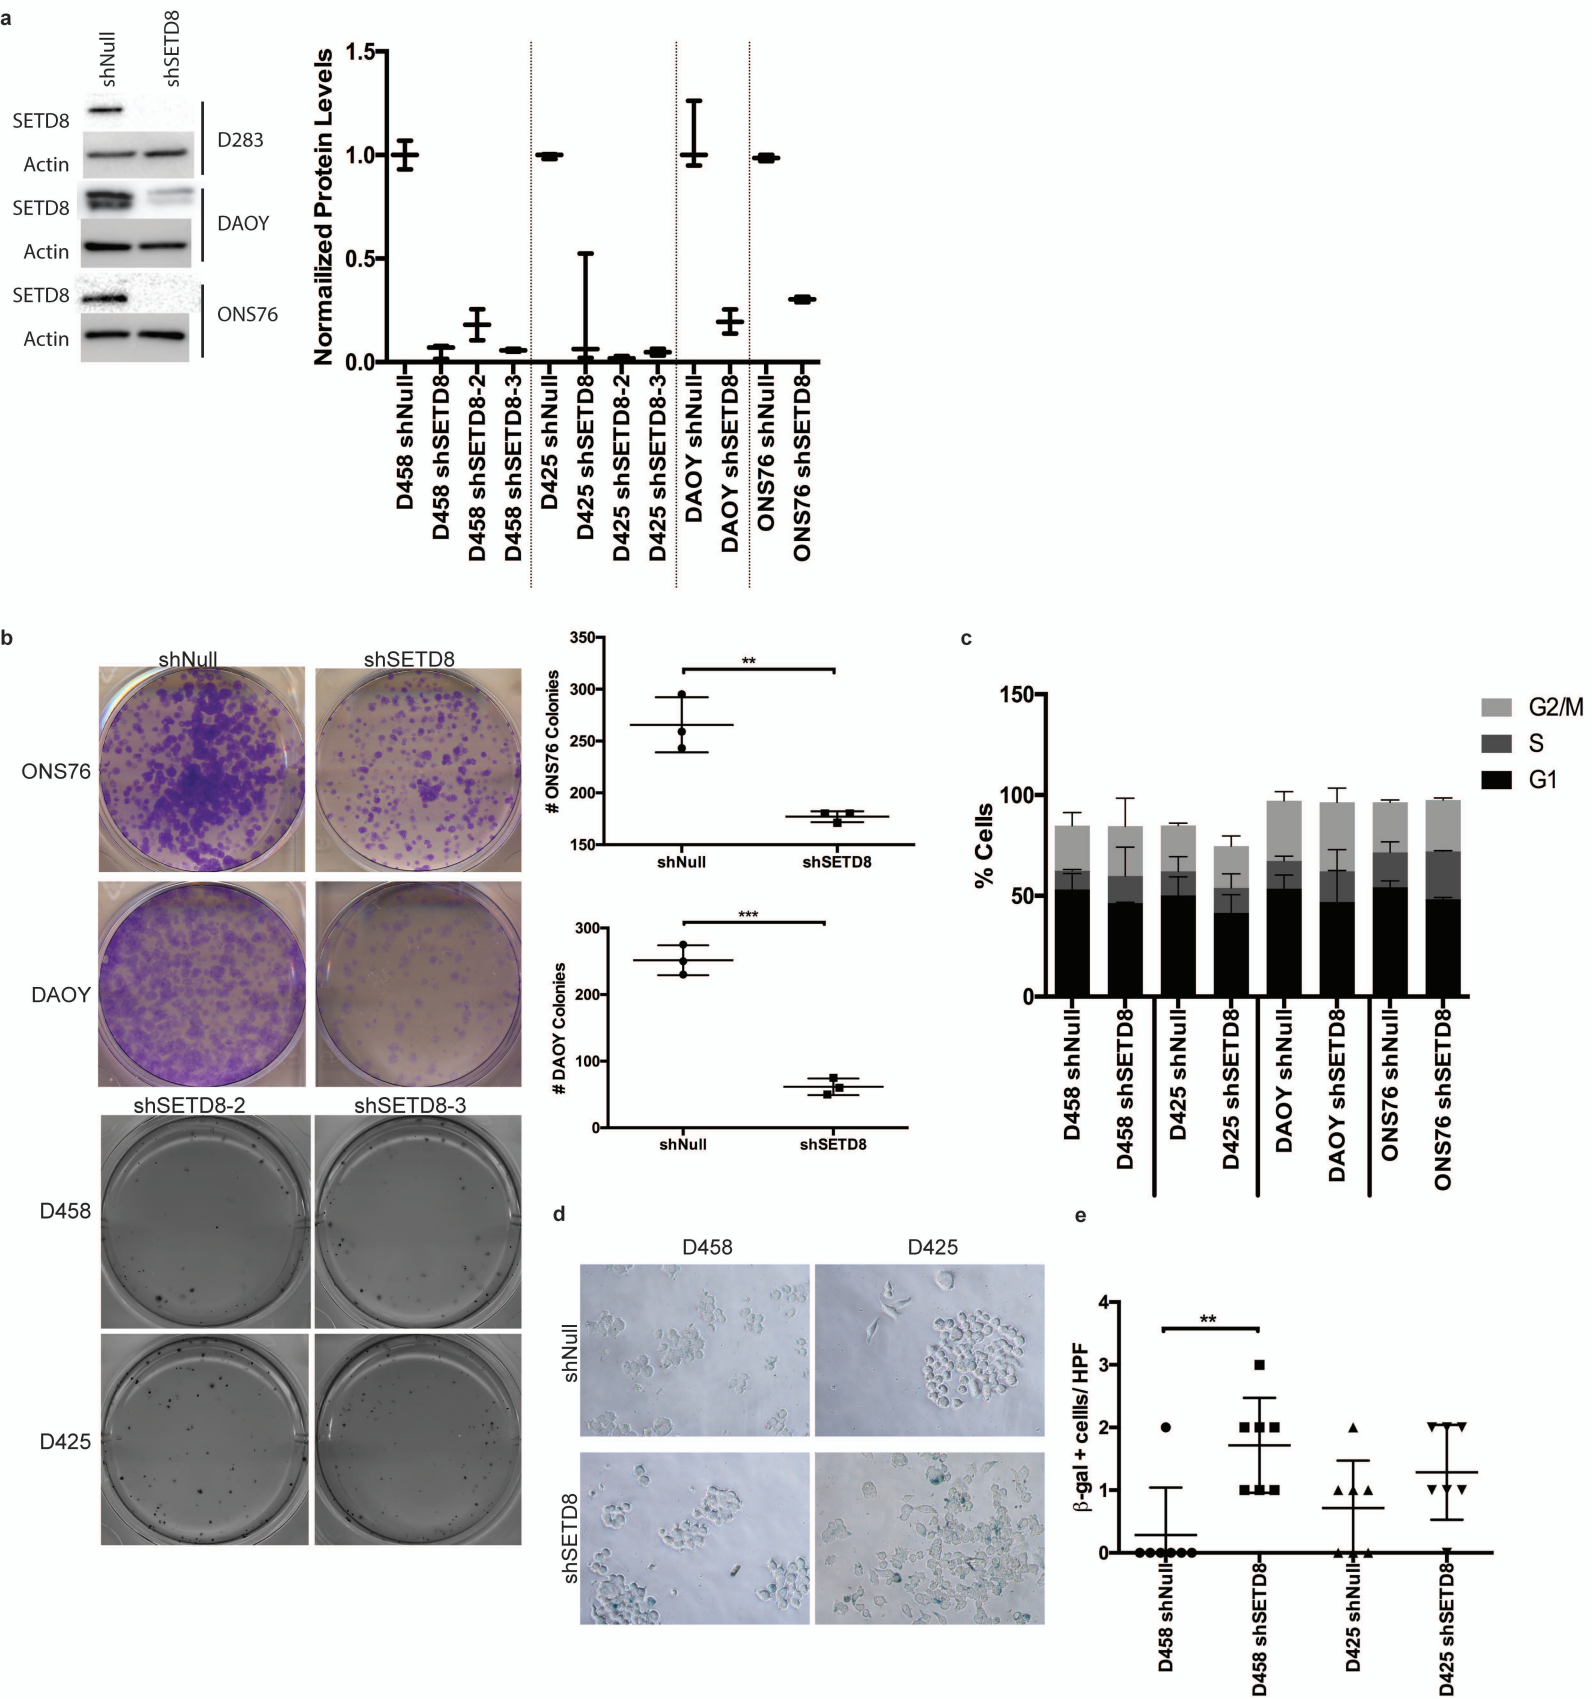

**Supplementary Figure S3.** (a) Top downregulated genes from Ingenuity analysis of the RNA-seq data and expression log ratio. Select genes in red. (b) Relative mRNA expression of *ILK1*, *ITGA5*, *IGFBP2*, *IGFBP3*, and *CXCR4* in D458 and D425 shSETD8 cells normalized to shNull in the respective cell line. Three independent replicates are shown as mean  $\pm$  SD. (c) Venn diagram of the top molecular and cellular functions represented in the downregulated gene set ( $p < 0.05$ ). (d) GSEA of D458 shNull vs shSETD8 RNA-Seq. FDR q-value and p-value are shown for each plot. G2M, Apoptosis, Adherens Junction, and P53 pathway are shown. (e) Western blot of P53 protein in all cell lines with shNull or shSETD8. Quantification shown. (f) Immunofluorescence staining of phalloidin and dapi from D458 and D425 shNull and shSETD8. Cells were stained with Alexa Fluor<sup>®</sup> 555 phalloidin and DAPI. Imaged on Keyence BZ-X800 fluorescence microscope. Representative images are shown. Dot blots represent three independent replicates and show number of F-actin loci/nucleus  $\pm$ SD. Images quantified on ImageJ. Asterisks indicate significant differences (unpaired t test; \*, p-value < 0.05; \*\*, p-value < 0.01).

Supplementary Figure S3.

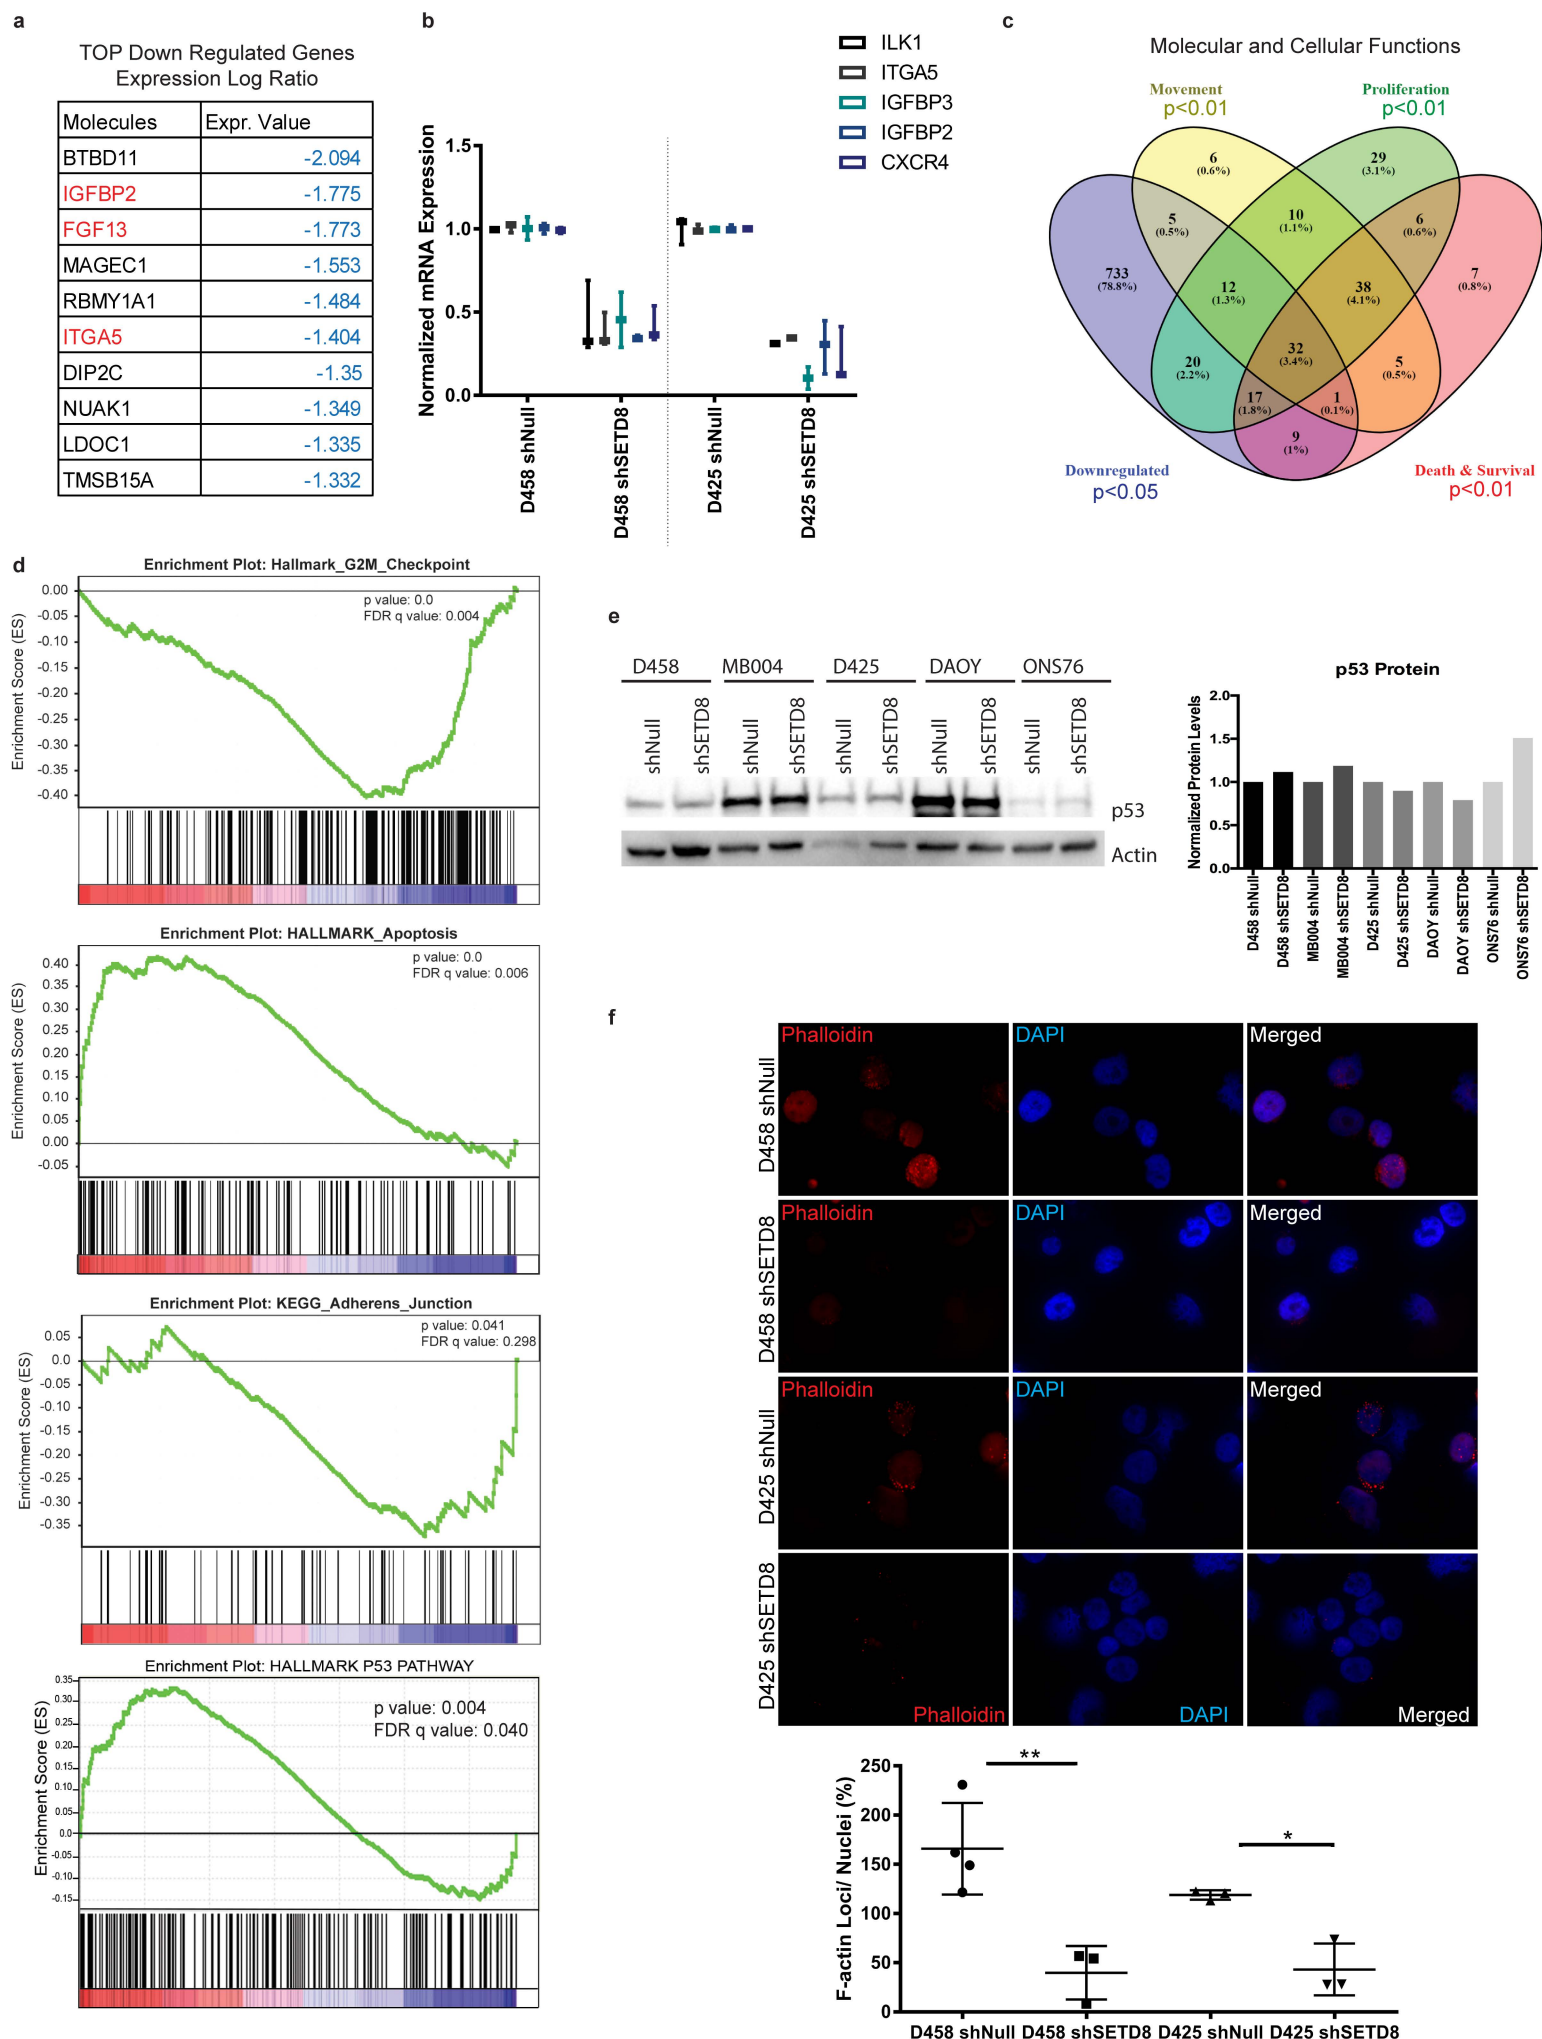

**Supplementary Figure S4.** (a) D458 and D425 shnull or shSETD8 neurosphere assay representative images for whole well 100 (4X), single-cells (10X), and secondary spheres (4X) as captured on Incucyte imaging system or Olympus U-CMAD microscope. (b) Immunofluorescence staining of 14 day old D458 shNull or shSETD8 neurospheres with  $\alpha$ -nestin and DAPI. Representative images are shown. (c) Relative mRNA expression of TWIST1, SNAI1, ZEB1, and MMP10 in shSETD8 cells normalized to shNull in the respective cell line. Three independent replicates are shown as mean  $\pm$  SD. (d) Protein quantification of western in Figure 5B. Three independent replicates are shown as mean  $\pm$  SD in a line and whisker plot. (e) Western blot of N-cadherin and Actin in DAOY shNull and shSETD8 cell line. (f) ONS76 migration and invasion data. Line graphs represent the cell index mean vs time  $\pm$  SD in three independent replicates.

Supplementary Figure S4.

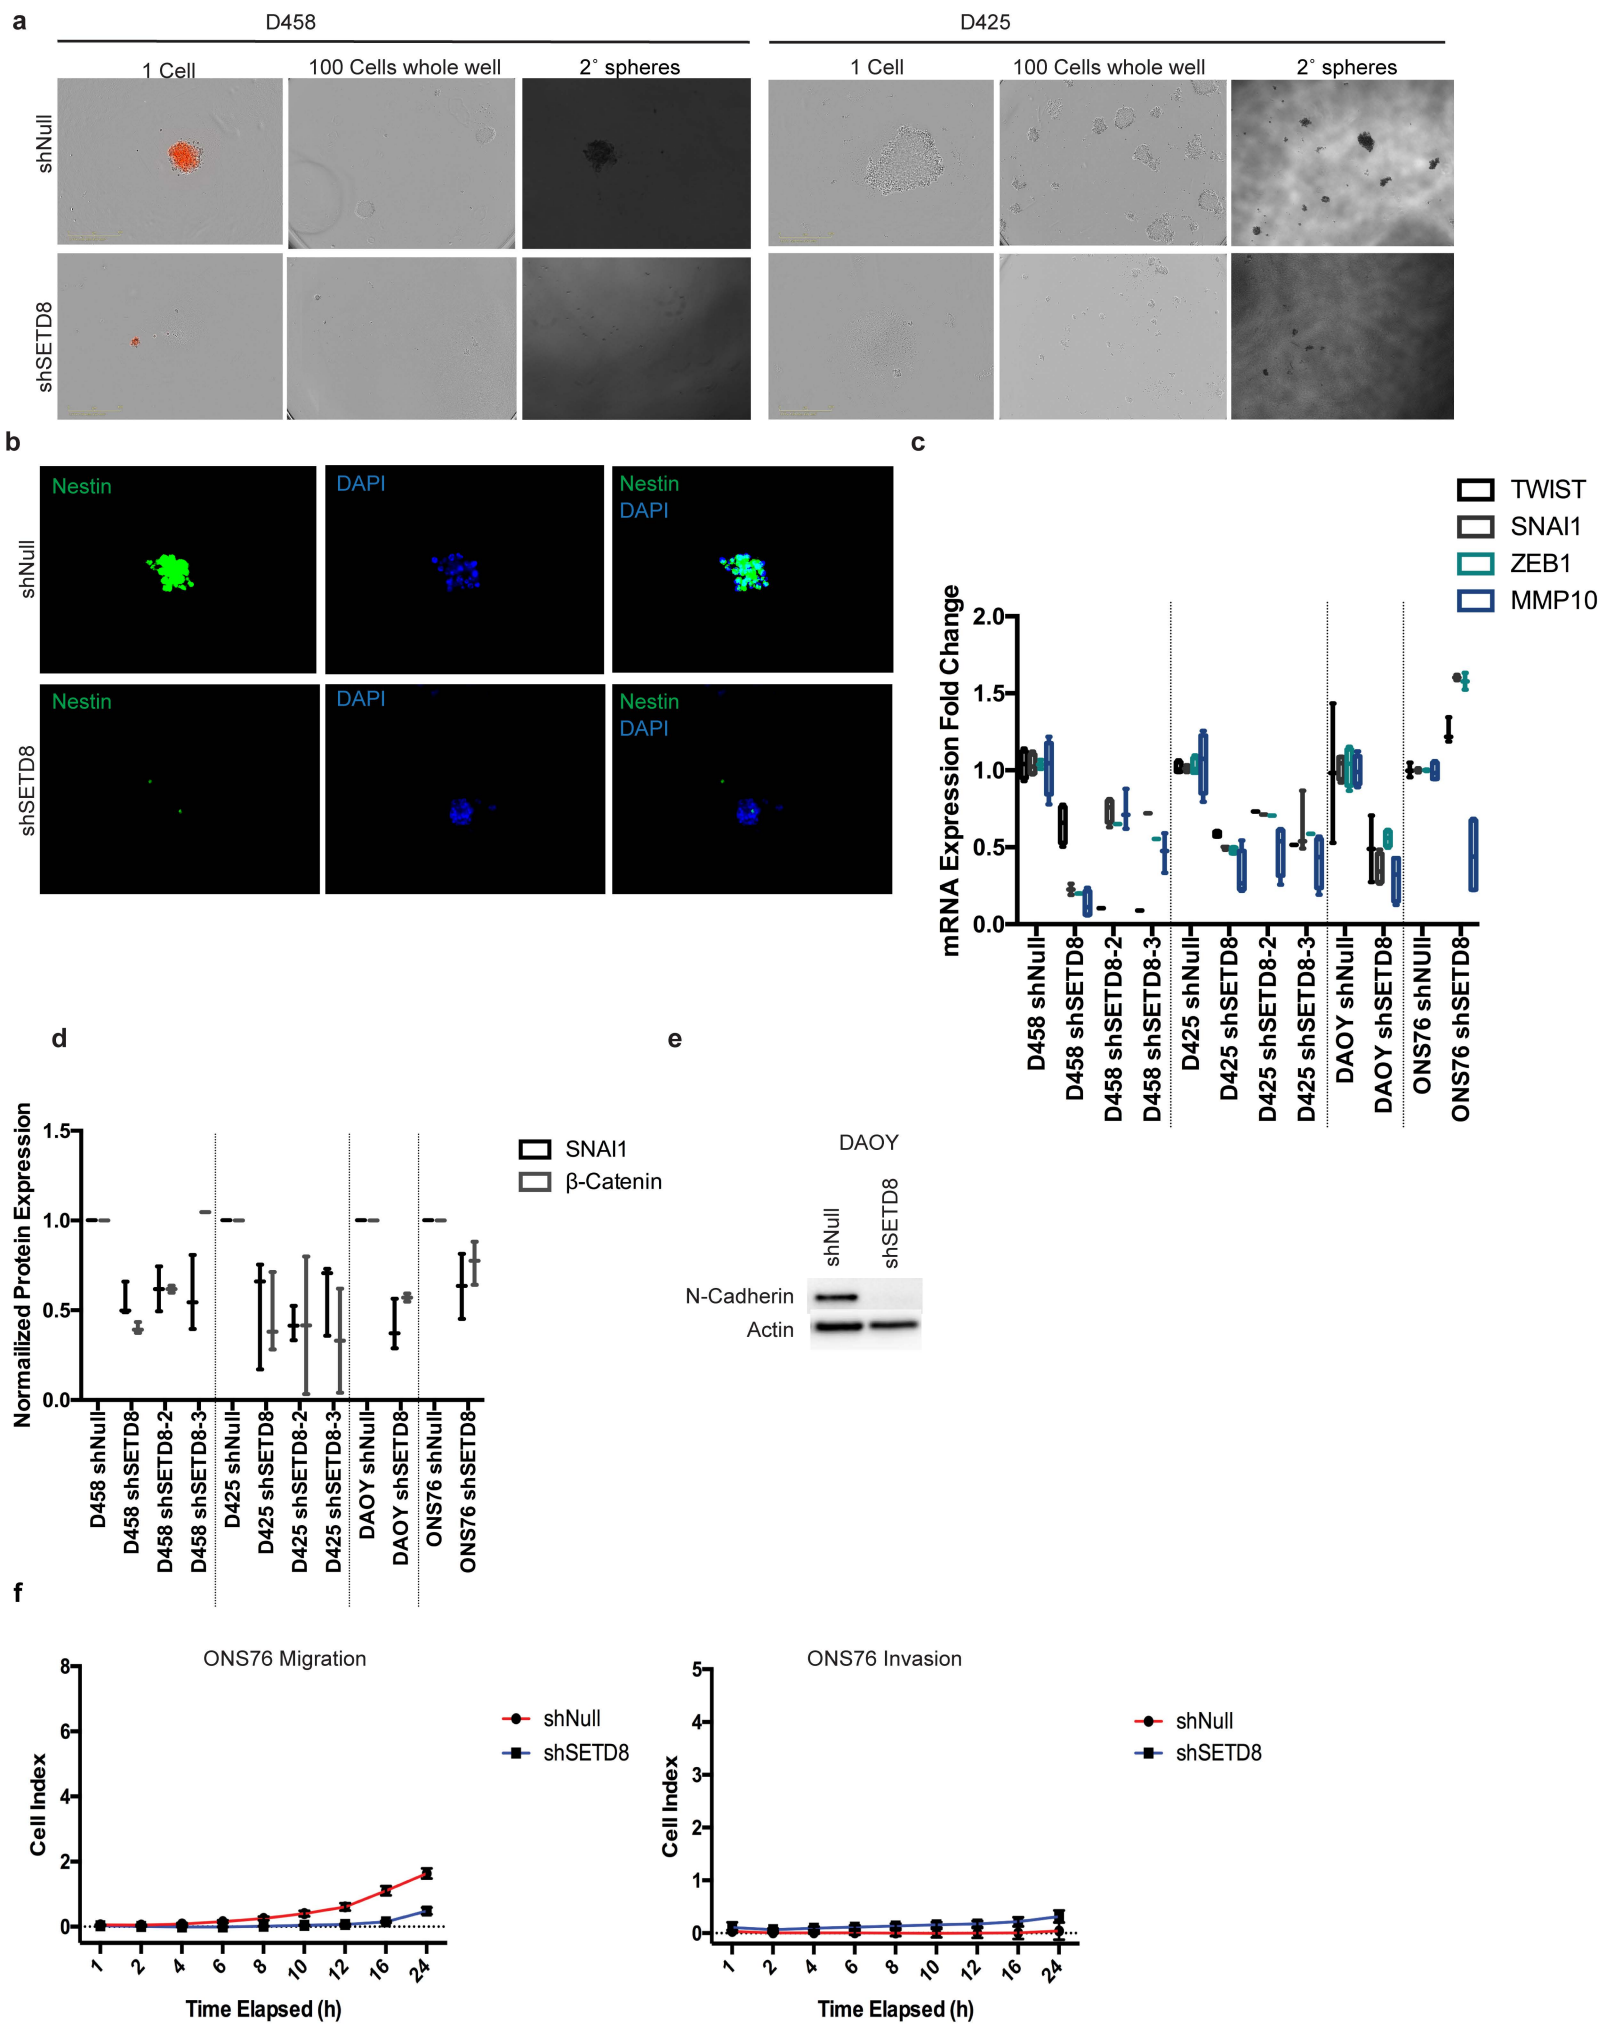



**Supplementary Figure S5.** (a) Western of cMYC and actin in shNull and shSETD8 MB cell lines. (b) TSS mapped H4K20me1 enriched regions (c) Kegg pathway hepatocellular carcinoma associated gene list.

# Supplementary Figure S5.

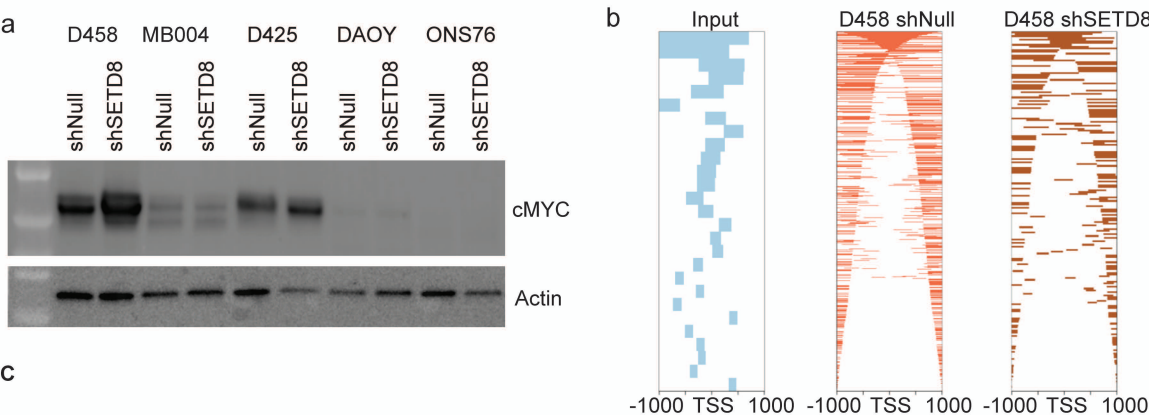

## Hepatocellular Carcinoma KEGG Pathway

| ENTREZ_GENE_ID | Name                                                                                                                       |
|----------------|----------------------------------------------------------------------------------------------------------------------------|
| 71             | <a href="#">actin gamma 1(ACTG1)</a>                                                                                       |
| 4609           | <a href="#">v-myc avian myelocytomatosis viral oncogene homolog(MYC)</a>                                                   |
| 1647           | <a href="#">growth arrest and DNA damage inducible alpha(GADD45A)</a>                                                      |
| 1026           | <a href="#">cyclin dependent kinase inhibitor 1A(CDKN1A)</a>                                                               |
| 4257           | <a href="#">microsomal glutathione S-transferase 1(MGST1)</a>                                                              |
| 8324           | <a href="#">frizzled class receptor 7(FZD7)</a>                                                                            |
| 6934           | <a href="#">transcription factor 7 like 2(TCF7L2)</a>                                                                      |
| 6932           | <a href="#">transcription factor 7 (T-cell specific, HMG-box)(TCF7)</a>                                                    |
| 6654           | <a href="#">SOS Ras/Rac guanine nucleotide exchange factor 1(SOS1)</a>                                                     |
| 5296           | <a href="#">phosphoinositide-3-kinase regulatory subunit 2(PIK3R2)</a>                                                     |
| 3265           | <a href="#">HRas proto-oncogene, GTPase(HRAS)</a>                                                                          |
| 2932           | <a href="#">glycogen synthase kinase 3 beta(GSK3B)</a>                                                                     |
| 3480           | <a href="#">insulin like growth factor 1 receptor(IGF1R)</a>                                                               |
| 10912          | <a href="#">growth arrest and DNA damage inducible gamma(GADD45G)</a>                                                      |
| 7477           | <a href="#">Wnt family member 7B(WNT7B)</a>                                                                                |
| 7015           | <a href="#">telomerase reverse transcriptase(TERT)</a>                                                                     |
| 81029          | <a href="#">Wnt family member 5B(WNT5B)</a>                                                                                |
| 2885           | <a href="#">growth factor receptor bound protein 2(GRB2)</a>                                                               |
| 6598           | <a href="#">SWI/SNF related, matrix associated, actin dependent regulator of chromatin, subfamily b, member 1(SMARCB1)</a> |
| 2950           | <a href="#">glutathione S-transferase pi 1(GSTP1)</a>                                                                      |
| 6599           | <a href="#">SWI/SNF related, matrix associated, actin dependent regulator of chromatin subfamily c member 1(SMARCC1)</a>   |
| 4041           | <a href="#">LDL receptor related protein 5(LRP5)</a>                                                                       |
| 4040           | <a href="#">LDL receptor related protein 6(LRP6)</a>                                                                       |
| 3845           | <a href="#">KRAS proto-oncogene, GTPase(KRAS)</a>                                                                          |
| 23401          | <a href="#">frequently rearranged in advanced T-cell lymphomas 2(FRAT2)</a>                                                |
| 7296           | <a href="#">thioredoxin reductase 1(TXNRD1)</a>                                                                            |
| 9817           | <a href="#">kelch like ECH associated protein 1(KEAP1)</a>                                                                 |
| 55274          | <a href="#">PHD finger protein 10(PHF10)</a>                                                                               |
| 1869           | <a href="#">E2F transcription factor 1(E2F1)</a>                                                                           |
| 2549           | <a href="#">GRB2 associated binding protein 1(GAB1)</a>                                                                    |
| 1857           | <a href="#">dishevelled segment polarity protein 3(DVL3)</a>                                                               |
| 8313           | <a href="#">axin 2(AXIN2)</a>                                                                                              |
| 60             | <a href="#">actin beta(ACTB)</a>                                                                                           |

**Supplementary Figure S6.** (a) Methylcellulose assay with D458, D425, and clonogenic assay with DAOY cells treated with 0.2 $\mu$ M UNC0379. Representative images are shown. (b) Protein quantification of western in Figure 8C. Three independent replicates are shown as mean $\pm$ SD in a line and whisker plot. Asterisks indicate significant differences (unpaired t test; \*\*\*, p-value<0.001; \*\*\*\*, p-value<0.0001). (c) Total number of colonies formed in (8D) of all three cell lines. Represented as the percentage of the control wells (DMSO) vs concentration of UNC0379  $\pm$ SD. Three independent replicates were done. (d) Box and whisker plot of % DRAQ5 + cells per cell line treatment. Three independent replicates are represented.

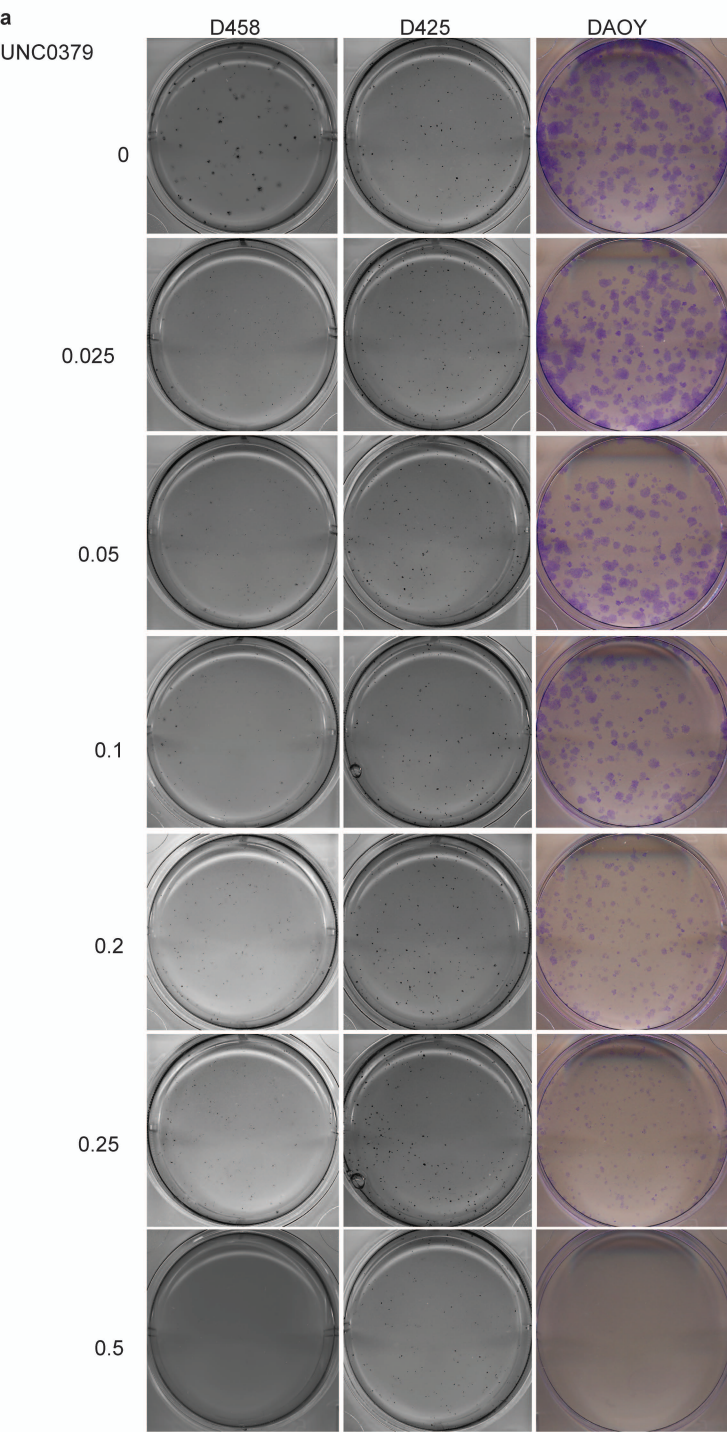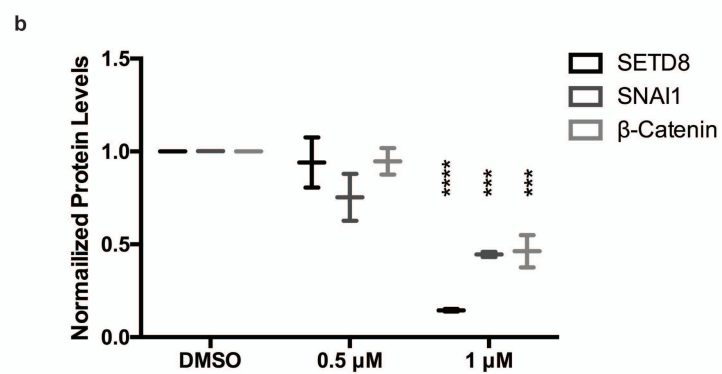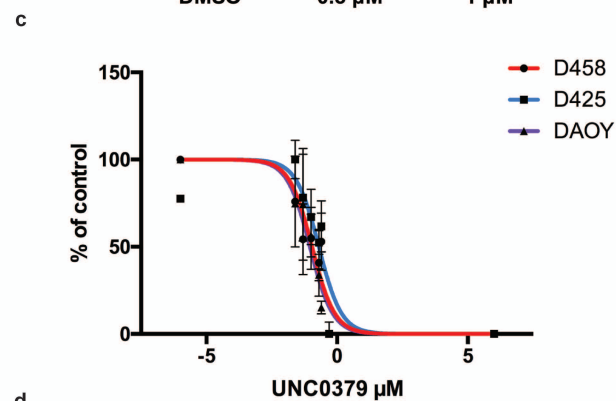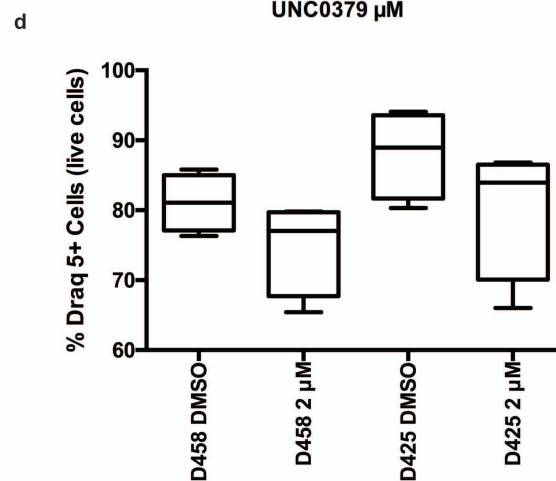

**Supplementary Figure S7.** (a) Kaplan-Meier survival plot from intracranial orthotopic mouse model with drug treatment. D458 DMSO (n=10) and UNC0379 (n=10) and D425 DMSO (n=10) and UNC0379 (n=10). (b) Tumor volume analysis of D458 DMSO and UNC0379 treated tumors at 14 and 18 days post injection.

# Supplemental Figure S7.

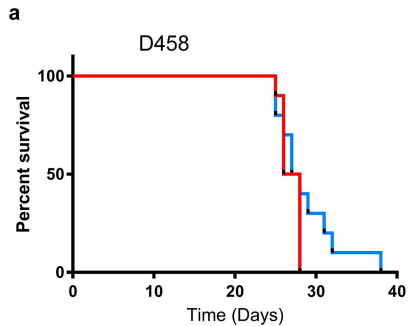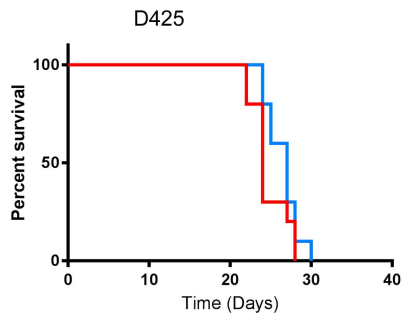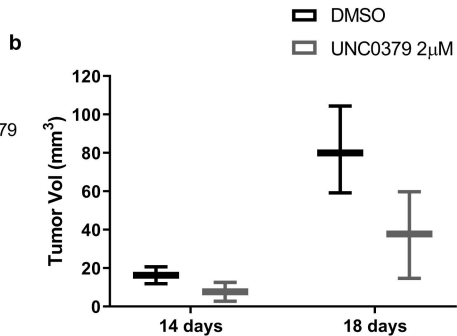

**Supplementary Table S1.** Complete chemical inhibitor list that met the 70% cell viability cut off.

Drug target and RNAi gene list shown.

Supplementary Table S1.

| <b>Drug</b>                                  | <b>Target</b>           | <b>RNAi Gene List</b> |         |
|----------------------------------------------|-------------------------|-----------------------|---------|
| MI-nc (hydrochloride)                        | Menin-ml1               | BRD3                  | ATAD2B  |
| IOX1                                         | 2OG-oxygenase           | WDR5                  | SATB1   |
| UNC0646                                      | G9a/GLP                 | SP100                 | NCOA3   |
| UNC0631                                      | G9a/GLP                 | ASH1L                 | SCML2   |
| S-(5'-Adenosyl)-L-methionine (tosylate)      | SAM                     | USP27X                | PAXIP1  |
| PFI-1                                        | BRD2, BRD4              | SSRP1                 | RNF2    |
| 5-Azacytidine                                | analog cytidine         | EHMT2                 | SETD6   |
| CPTH2 (hydrochloride)                        | GCN5                    | ASH2L                 | PCGF1   |
| (R)-PFI-2 (hydrochloride)                    | SETD7/9                 | HCFC1                 | SUZ12   |
| Etoposide                                    | TOPO II                 | RING1                 | UBE2A   |
| 2,4-DPD                                      | HIF1 $\alpha$ -PH       | BAZ2B                 | BAZ2A   |
| (-)-Nepanocin A                              | SAH                     | EP400                 | HDAC6   |
| Decitabine                                   | analog cytidine         | CHAF1A                | SMARCA5 |
| DMOG                                         | HIF1 $\alpha$ -PH       | SIN3A                 | UHRF1   |
| 6-Thioguanine                                | analog thiopurine       | MTA2                  | ING2    |
| 2,4-Pyridinedicarboxylic Acid                | $\alpha$ -ketoglutarate | ORC1                  | EPC2    |
| SGI-1027                                     | DNMT1, DNMT3a/3b        | KAT6A                 | HLTF    |
| S-Adenosylhomocysteine                       | SAM                     | MLL5                  | SMARCA2 |
| UNC0638                                      | G9a/GLP                 | ARID4B                | PBRM1   |
| C646                                         | P300                    | BRD4                  | PADI4   |
| UNC0379                                      | SETD8                   | INO80                 | PRMT3   |
| Mirin                                        | MIRN                    | BMI1                  | PRDM2   |
| Isoliqurritigenin                            | quinone reductase-1     | MLL2                  | MBD4    |
| JIB-04                                       | Jumonji                 | BRD1                  | DNMT3L  |
| GSK126                                       | EZH2                    | SETD8                 | SIRT3   |
| 3-Deazaneplanocin A (hydrochloride)          | EZH2                    | RBBP4                 | DNMT1   |
| Sinefungin                                   | SET domain              | PHF19                 | HDAC5   |
| GSK-J5 (hydrochloride)                       | JMJD3                   | SUV420H2              | UBE2I   |
| 4-pentynoyl-Coenzyme A (trifluoroacetate sa  | acetyl-coA reporter     | KANSL1                | RBBP7   |
| RVX-208                                      | BRD4                    | NCOR1                 | HAT1    |
| 3-amino Benzamide                            | PARP                    | RNF20                 | PRMT8   |
| $\alpha$ -Hydroxyglutaric Acid (sodium salt) | 2OG-oxygenase           | PRKAA1                | CARM1   |
| 5-Methyl-2'-deoxycytidine                    | analog pyrimidine       | PHC2                  | EZH2    |
| SGC-CBP30                                    | CREB/P300               | SETD2                 | SFMBT2  |
| BIX01294 (hydrochloride hydrate)             | G9a/GLP                 | TRIM33                | JMJD1C  |
| Anacardic Acid                               | P300, PCAF              | SETDB2                | BRD7    |
| PFI-3                                        | SMARCA2/4               | ERCC5                 | HDAC3   |
| Rucaparib (phosphate)                        | PARP                    | NAP1L2                | BPTF    |
| Garcinol                                     | P300, PCAF, GCN5        |                       |         |
| MI-2 (hydrochloride)                         | Menin-ml1               |                       |         |
| 3-Deazaneplanocin A                          | EZH2                    |                       |         |
| GSK-J4 (hydrochloride)                       | JMJD3                   |                       |         |
| GSK2801                                      | BAZ2A/B                 |                       |         |
| UNC0642                                      | G9a/GLP                 |                       |         |
| UNC1215                                      | L3MBTL3                 |                       |         |
| 2-PCPA (hydrochloride)                       | LSD1                    |                       |         |
| Chaetocin                                    | BRD4                    |                       |         |

Methyltransferase inhibitor  
Histone Acetylase inhibitor  
Oxygen sensing  
Demethylase inhibitor  
DNA Damage  
Bromodomain Anagtonist



**Supplementary Table S2.** ChIP primer sequences.

**Supplemental Methods.**

**Clonogenic assay.** Cells were plated at 1000 cells/well in a 6-well dish in 2 mL complete media and allowed to grow for ten days. Cells were then stained with crystal violet and counted.

**Immunofluorescence.** D458 neurospheres were spun down onto slides using Shandon Cytospin 4 (Thermo Fisher). Neurospheres were fixed in 4% paraformaldehyde in PBS. Cells were then washed 0.2% Triton X-100 in PBS and blocked in 5% milk in 0.05% Triton X-100 in PBS for 30min. Cells were stained with  $\alpha$ -nestin Cat#ab105389 (AbCam) overnight. Cells were washed then exposed to 2° Alexa fluor 488 Cat#A11001 (ThermoFisher) 1hr RT. Cells were washed again then Prolong® Gold antifade with DAPI Cat#P36935 (Thermo Fisher) was applied and coverslipped. Alexa Fluor 555 Phalloidin Cat#8953 (Cell Signaling Technology) was used for phalloidin staining. Cells were plated in 8-well chamber slide overnight. Fixed and blocked as previously described, then stained for 15 mins, washed, DAPI applied, and coverslipped. Images were obtained on the Keyence BZ-X800 fluorescence microscope, and analyzed with ImageJ.

**Cell cycle analysis.** Cells in growth phase were collected and fixed in 70% ethanol overnight. Fixed cells were washed with PBS and suspended in 100 $\mu$ L 2% FBS/PBS, stained with 1:1000 dilution of DRAQ5™ fluorescent probe (ThermoFisher) for 30 min in the dark. Cells were studied on Amnis Flowsight® Imaging Flow Cytometer (Millipore Sigma) and analyzed by Amnis IDEAs software.

**$\beta$ -Galactosidase senescence Assay.** Cells were plated at 5x10<sup>4</sup> in a 6 well dish and grown overnight. Senescence  $\beta$ -Galactosidase staining kit Cat#9860 (Cell signaling technology) was used to stain overnight with 1mL of  $\beta$ -galactosidase solution with 20mg/ml of X-gal at 37°C in dry incubator. Cells were then imaged on Nikon ECLIPSE TS100 with a Nikon DSFi1.

Supplementary Table S2.

| ChIP Primers         | Sequence               |
|----------------------|------------------------|
| C-MYC sites          |                        |
| myc1SETD8F_qRT       | ATCAAAGCTGCTGGAGAGGTCG |
| myc1SETD8R_qRT       | GATCTGGGACTTCCGGTTCTC  |
|                      |                        |
| myc2SETD8F_qRT       | GAGGGCATAGGCAGAGTACC   |
| myc2SETD8R_qRT       | TAGCATCCTTCAAGGCAGGG   |
|                      |                        |
| myc3SETD8F_qRT       | ATGGTGTCTACCTTTGCAGGG  |
| myc3SETD8R_qRT       | AGAAGGGCTGTACTTGACCG   |
|                      |                        |
| snail.6H4K20F_qRT    | AAGCAGACACCTTCCCAATC   |
| snail.6H4K20R_qRT    | CACCTTTCCCATATCCAGCTC  |
|                      |                        |
| bcatenin.3H4K20F.qRT | GTTCCCCTGAGGTGCTTG     |
| bcatenin.3H4K20R.qRT | TGCTACGAAGTTTGGCTCC    |
|                      |                        |
| twist.3H4K20F.qRT    | AGCTTGCCATCTTGGAGTC    |
| twist.3H4K20R.qRT    | AGCAAGATTCAGACCCTCAAG  |
|                      |                        |
| MYC3.H4K20F_qRT      | TCCACGAACTTTGCCCATAG   |
| MYC3.H4K20R_qRT      | GAGAGTCGCGTCCTTGC      |

Full unedited gel for Figure 2A

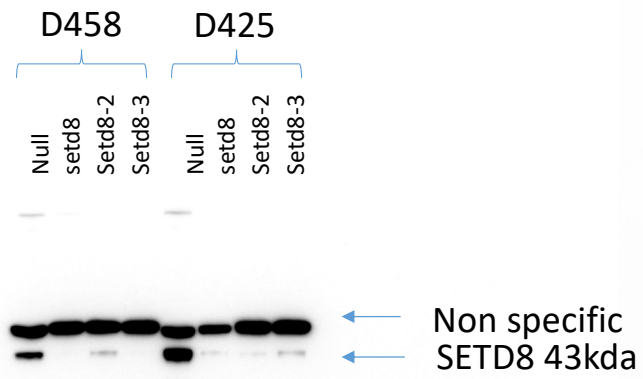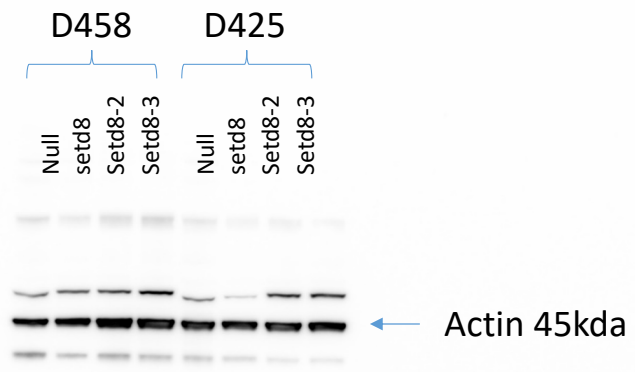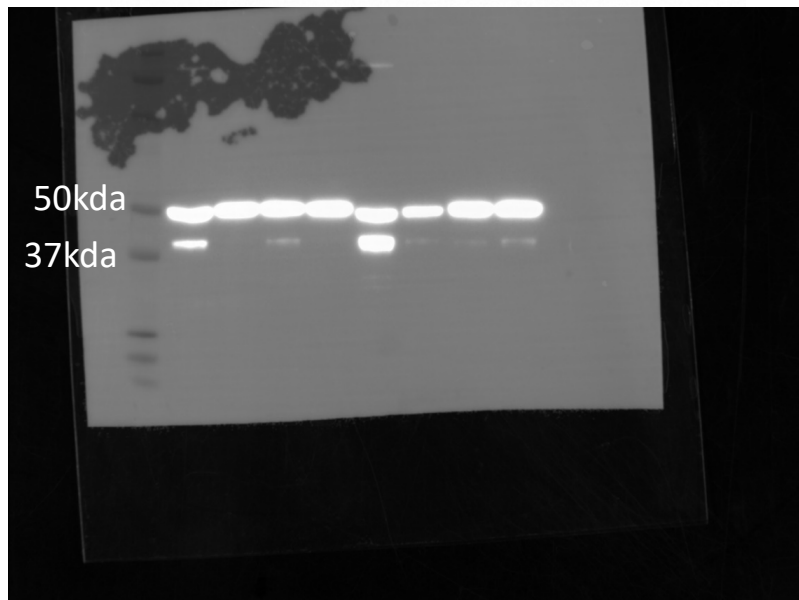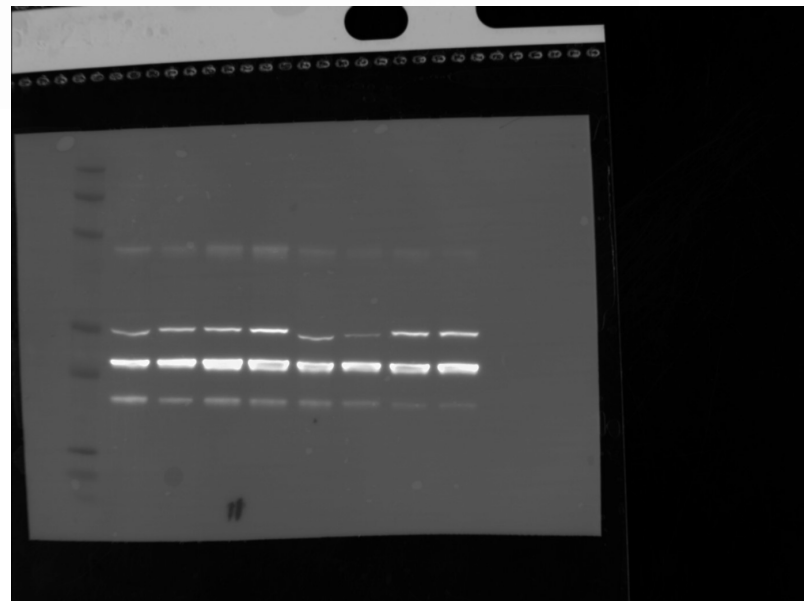

Full unedited gel for Figure 5B

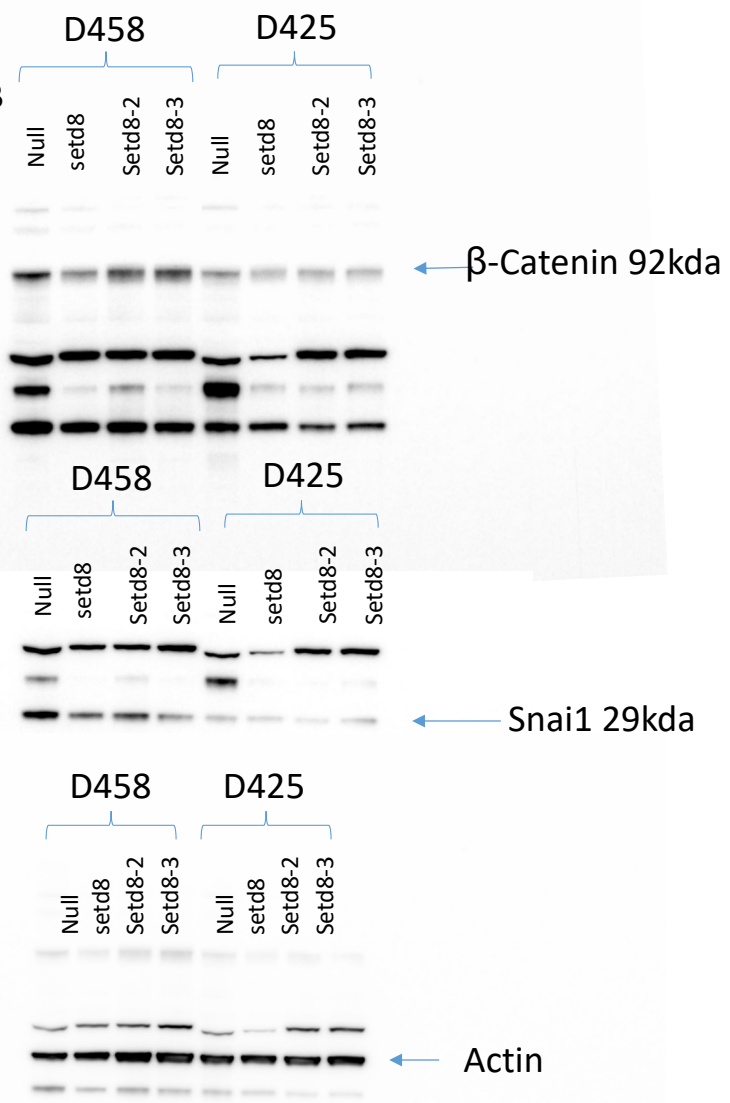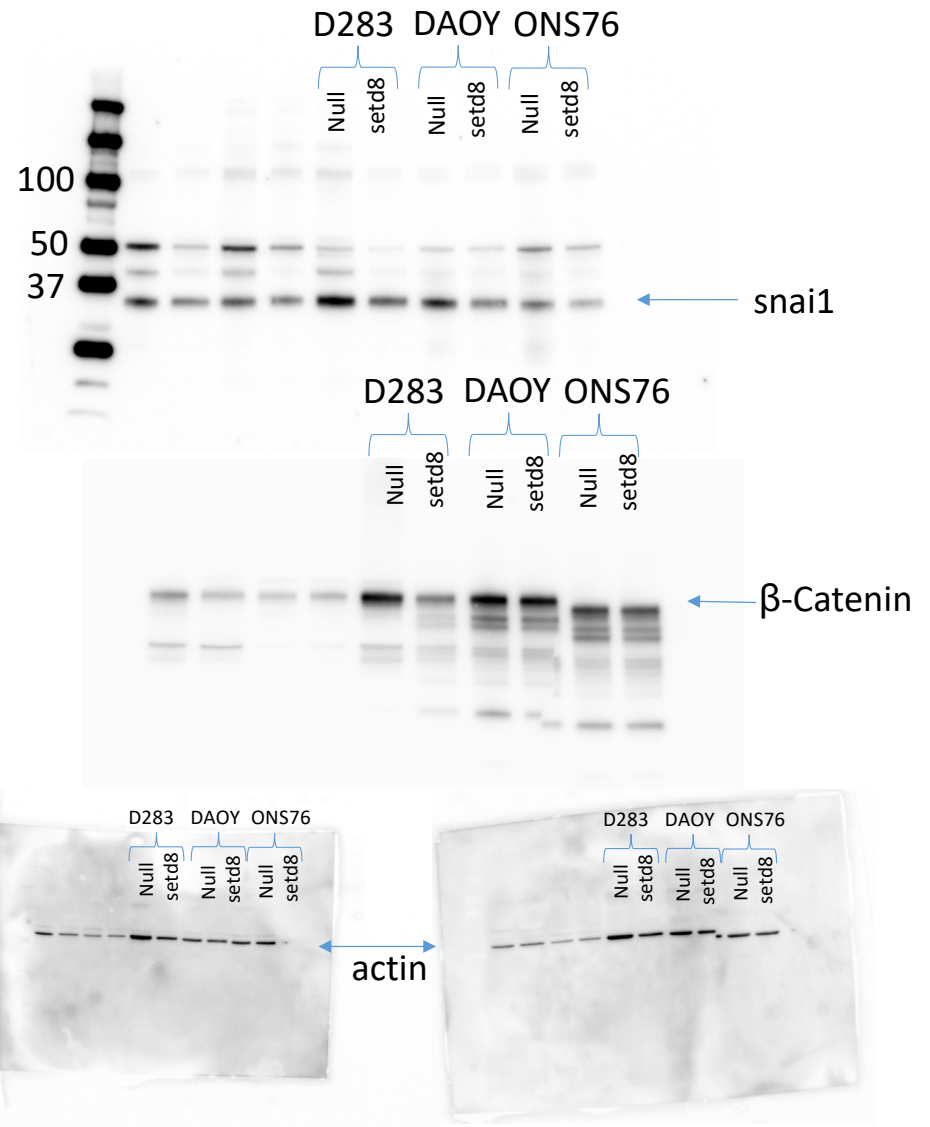

Full unedited gel for Figure 5B

D283 DA0Y ONS76

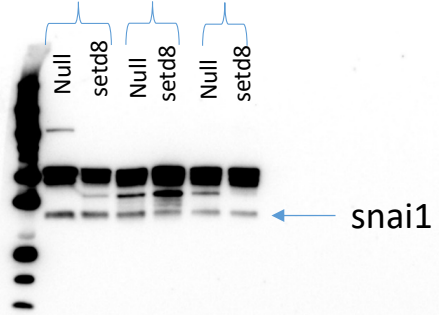

D283 DA0Y ONS76

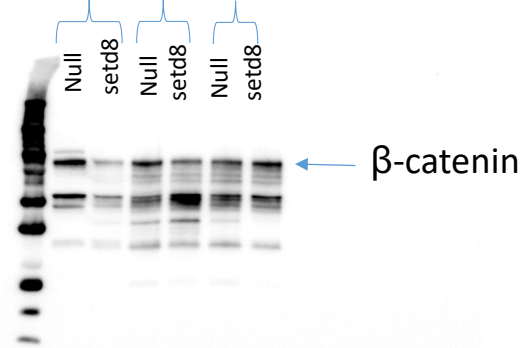

D283 DA0Y ONS76

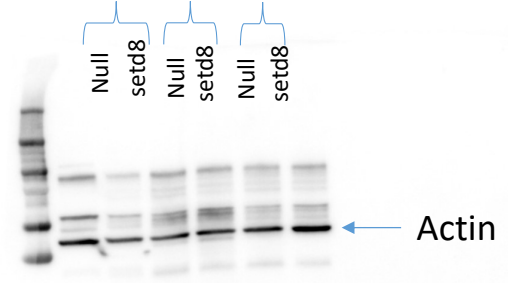

Full unedited gel for Figure 8C

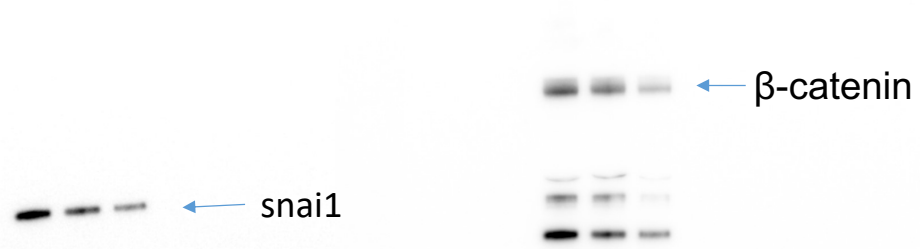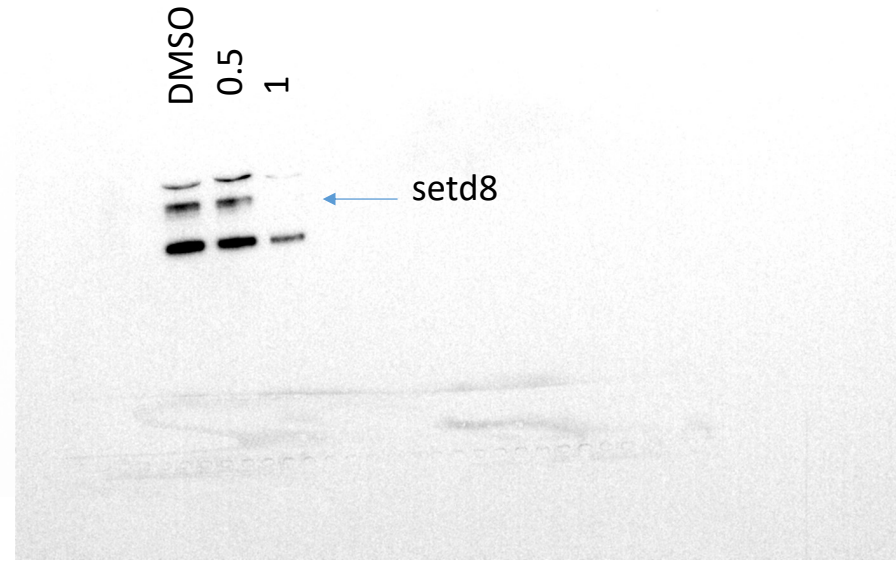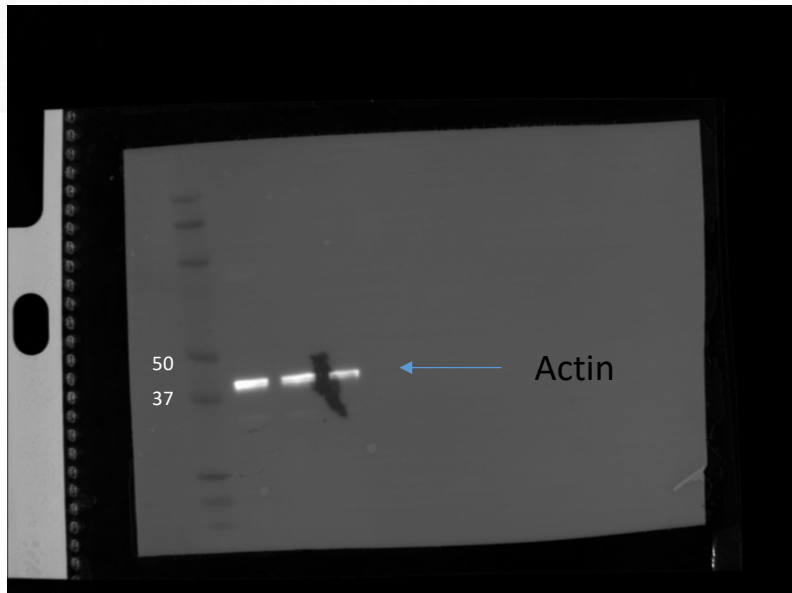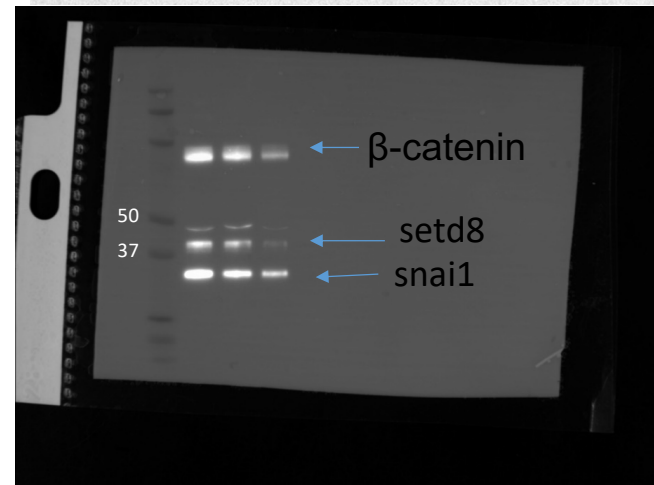

Full unedited gel for Supplemental S3 and S5

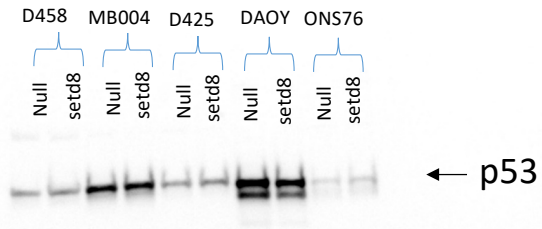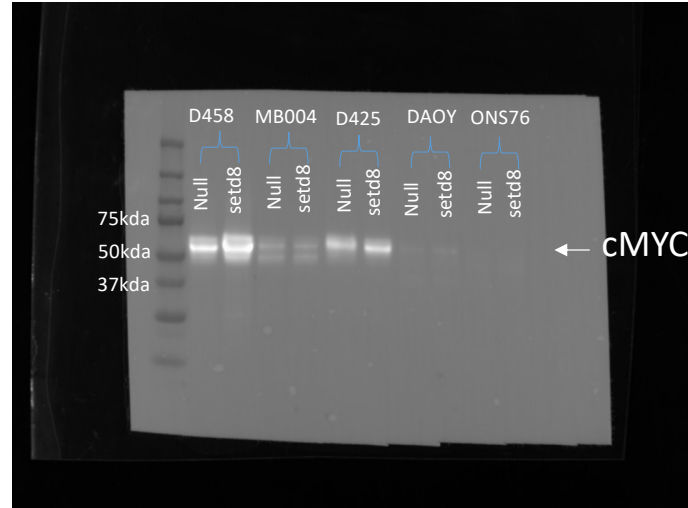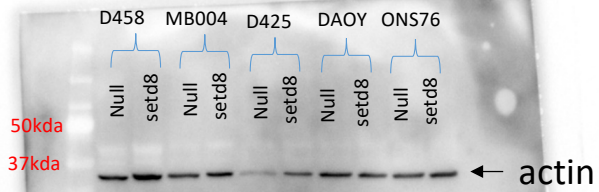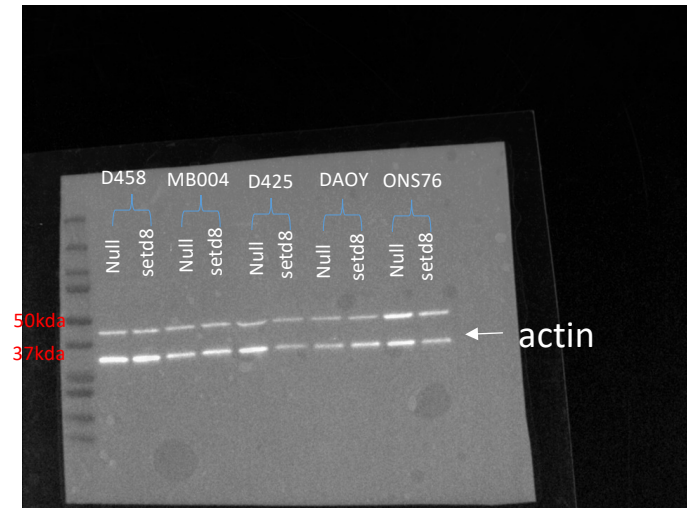

Supplement: sd1 [file 1]
